# Supplementary material
Source: PubMed Central journal article supplement (PMC1200273)

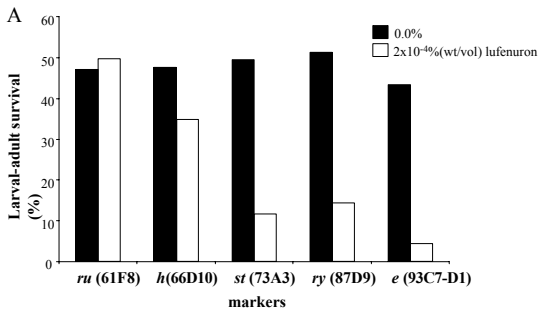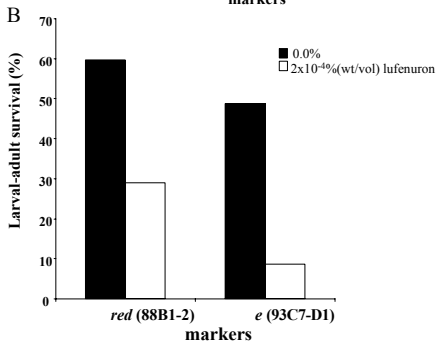

Supplement: pnas_0503709102_1.pdf [file pnas_0503709102_1.pdf]

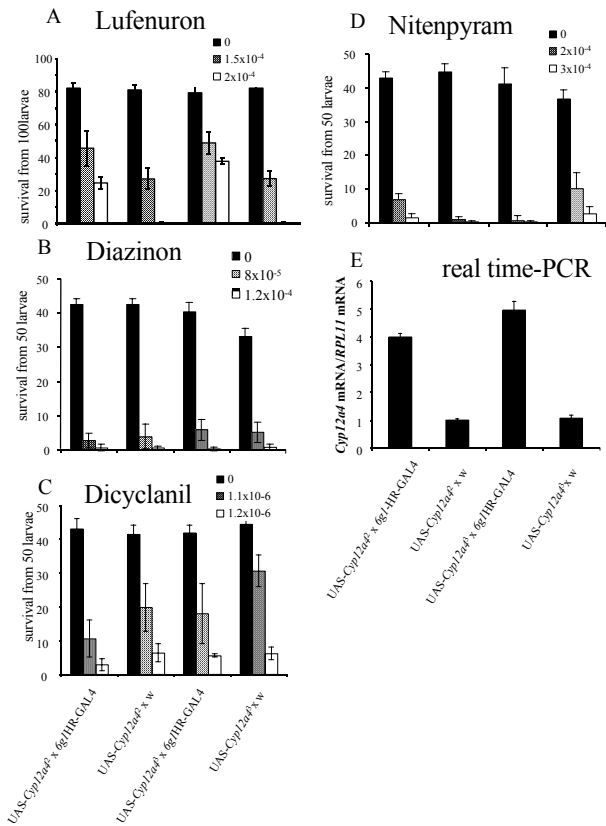

Supplement: pnas_0503709102_3.pdf [file pnas_0503709102_3.pdf]
